# Supplementary material
Source: MDPI journal article supplement (https://www.mdpi.com/2076-3263/11/8/339)
Supplement: s1 [file s1]

## Supplementary Material

The supplementary material is composed of pictures of the sample sites (Figure S1), an equation demonstrating the mass balance of the measured catchment averaged denudation rates (Equation S1), a table summarizing the geographical location, day, and time of samples collection (Table S1), and a table containing the full data on the chemical composition of the each sample according to the ICP-MS analysis conducted by the Activation Laboratories Ltd. based in Ontario, Canada (Table S2).

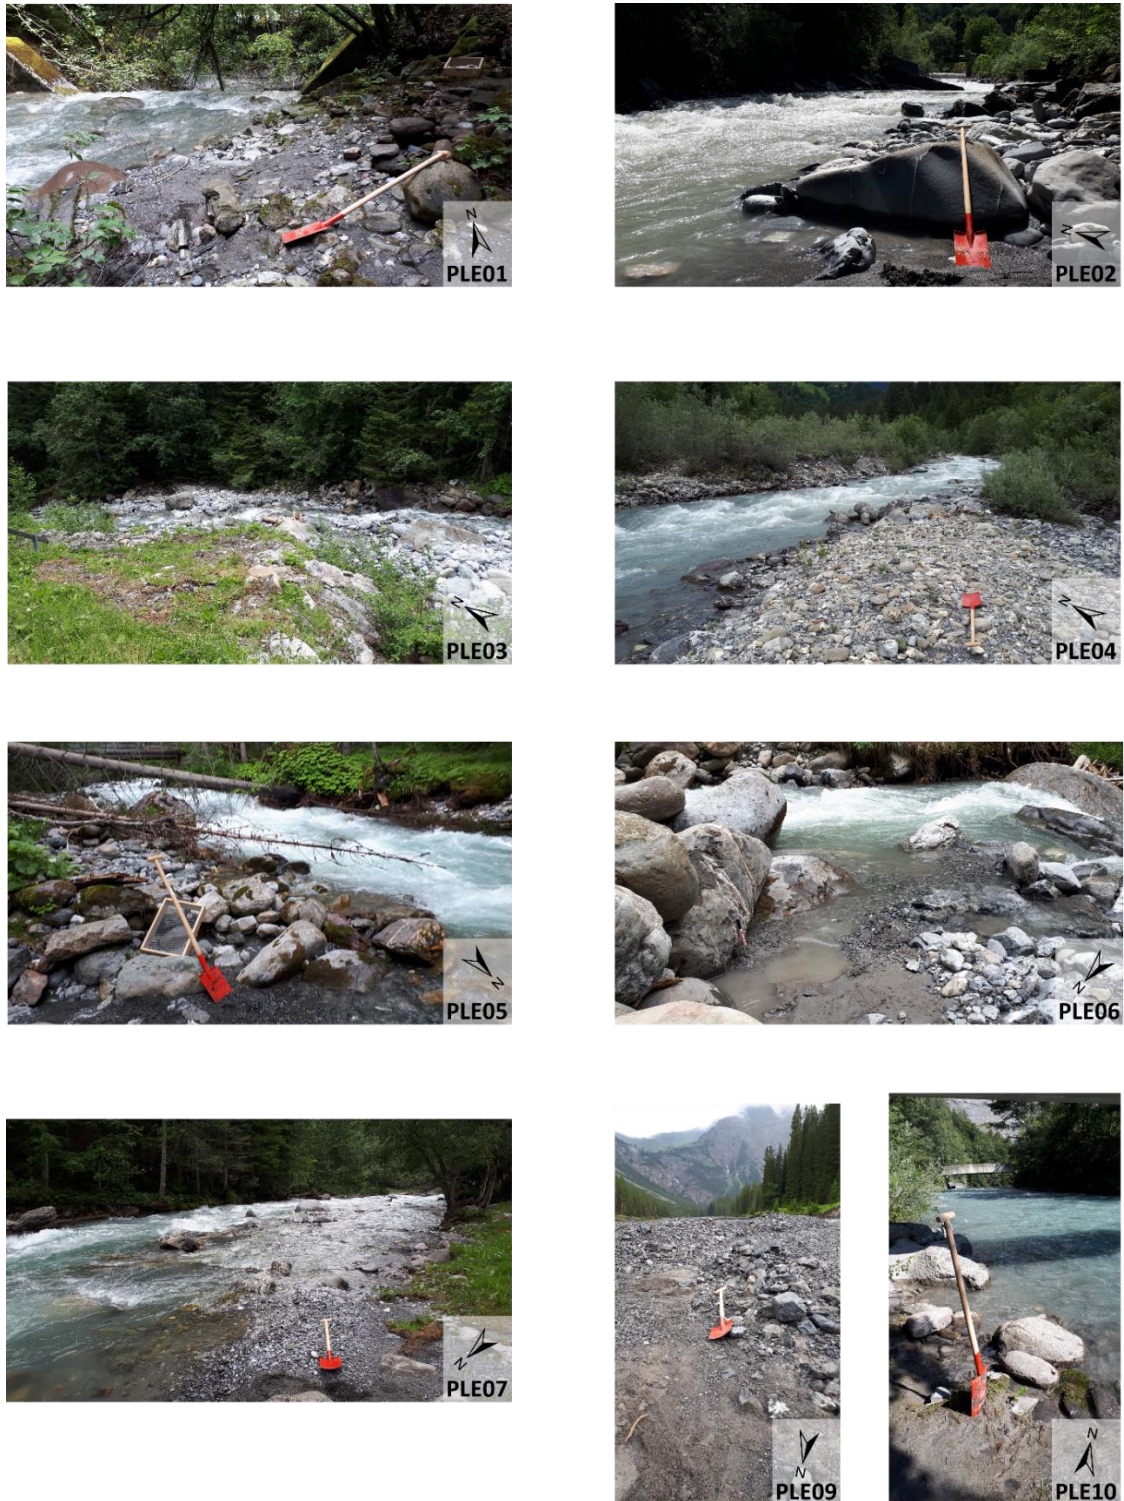

**Figure S1.** Pictures of the sample sites. The location of samples PLE08, RHE01 and RHE02 were not photographed.

**Equation S1.** Mass balance

$$(a * D_1) + (b * D_2) = 1 * D$$

The terms  $a$  and  $b$  represent the relative proportion of the area of the Plessur Basin, where the upstream part is 50% and the downstream part is also 50%. Accordingly,  $a = 0.5$  and  $b = 0.5$ , thus  $a + b = 1$ . Denudation rates in the upstream part  $D_1$  equal  $0.4 \text{ mm a}^{-1}$ , whereas the denudation rates in the downstream part  $D_2$  are unknown. The denudation rate  $D$  of the entire basin equals  $0.8 \text{ mm a}^{-1}$ , accordingly,  $D = 0.8 \text{ mm a}^{-1}$ . Therefore,  $D_2$  can be calculated as follows:

$$\begin{aligned} \left(0.5 * 0.4 \frac{\text{mm}}{\text{a}}\right) + \left(0.5 * D_2 \frac{\text{mm}}{\text{a}}\right) &= 1 * 0.8 \frac{\text{mm}}{\text{a}} \\ \left(0.2 \frac{\text{mm}}{\text{a}}\right) + \left(0.5 * D_2 \frac{\text{mm}}{\text{a}}\right) &= 0.8 \frac{\text{mm}}{\text{a}} \\ D_2 &= 1.2 \frac{\text{mm}}{\text{a}} \end{aligned}$$

The result of this mass balance means that, while the upstream half of the Plessur Basin yields a denudation rate of  $0.4 \text{ mm a}^{-1}$ , the downstream half requires a denudation rate of  $1.2 \text{ mm a}^{-1}$  to reach the total measured denudation rate of  $0.8 \text{ mm a}^{-1}$ . In other words, the downstream portion of the Plessur Basin, comprising the Lower Penninic Units, requires up to three times larger contribution to reach the measured  $0.8 \text{ mm a}^{-1}$ .

**Table S1.** Location, day, and time of sample collection.

| Sample | Longitude* | Latitude* | Date of Collection | Time of Collection |
|--------|------------|-----------|--------------------|--------------------|
| PLE01  | 9.546816   | 46.83529  | 15.07.2019         | 11:37              |
| PLE02  | 9.549314   | 46.83545  | 15.07.2019         | 11:59              |
| PLE03  | 9.614563   | 46.81399  | 15.07.2019         | 13:54              |
| PLE04  | 9.658927   | 46.82722  | 15.07.2019         | 15:33              |
| PLE05  | 9.706768   | 46.818    | 15.07.2019         | 16:43              |
| PLE06  | 9.709442   | 46.8186   | 15.07.2019         | 17:03              |
| PLE07  | 9.704013   | 46.82169  | 15.07.2019         | 17:33              |
| PLE08  | 9.682774   | 46.77642  | 15.07.2019         | 18:30              |
| PLE09  | 9.685765   | 46.77529  | 15.07.2019         | 18:41              |
| PLE10  | 9.510231   | 46.86273  | 16.07.2019         | 10:23              |
| RHE01  | 9.503988   | 46.8629   | 16.07.2019         | 10:40              |
| RHE02  | 9.498726   | 47.03002  | 16.07.2019         | 11:35              |

\* The coordinates are in the CH1903\_LV03 system.

Table S2. Complete results of the ICP-MS analysis showing the composition of each sample.

| Analyte Symbol  | SiO2    | Al2O3   | Fe2O3(T) | MnO     | MgO     | CaO     | Na2O    | K2O     | TiO2    | P2O5    | LOI   | Total   |
|-----------------|---------|---------|----------|---------|---------|---------|---------|---------|---------|---------|-------|---------|
| Unit Symbol     | %       | %       | %        | %       | %       | %       | %       | %       | %       | %       | %     | %       |
| Detection Limit | 0.01    | 0.01    | 0.01     | 0.001   | 0.01    | 0.01    | 0.01    | 0.01    | 0.001   | 0.01    |       | 0.01    |
| Analysis Method | FUS-ICP | FUS-ICP | FUS-ICP  | FUS-ICP | FUS-ICP | FUS-ICP | FUS-ICP | FUS-ICP | FUS-ICP | FUS-ICP | GRAV  | FUS-ICP |
| PLE01           | 45.96   | 7.77    | 3.15     | 0.061   | 2.03    | 20.61   | 0.65    | 1.36    | 0.394   | 0.16    | 18.3  | 100.4   |
| PLE02           | 38.16   | 6.66    | 3.45     | 0.068   | 5.04    | 21.42   | 0.55    | 1.15    | 0.404   | 0.13    | 21.44 | 98.47   |
| PLE03           | 34      | 7.56    | 3.23     | 0.083   | 7.18    | 19.68   | 0.48    | 1.53    | 0.406   | 0.1     | 24.54 | 98.79   |
| PLE04           | 34.93   | 7.72    | 3.82     | 0.068   | 7.87    | 20.24   | 0.56    | 1.32    | 0.494   | 0.12    | 23    | 100.1   |
| PLE05           | 23.62   | 5.13    | 3.11     | 0.085   | 14.87   | 20.79   | 0.33    | 1.06    | 0.325   | 0.07    | 29.41 | 98.8    |
| PLE06           | 34.64   | 4.26    | 2.87     | 0.068   | 7.42    | 23.08   | 0.55    | 0.69    | 0.445   | 0.13    | 24.42 | 98.57   |
| PLE07           | 29.91   | 5.54    | 3.16     | 0.073   | 9.93    | 21.92   | 0.5     | 1.03    | 0.426   | 0.1     | 25.85 | 98.42   |
| PLE08           | 42.64   | 11.05   | 6.39     | 0.157   | 10.04   | 7.89    | 0.78    | 1.99    | 0.662   | 0.14    | 17.18 | 98.94   |
| PLE09           | 4.41    | 1.18    | 0.69     | 0.057   | 19.49   | 29.29   | 0.05    | 0.35    | 0.06    | 0.02    | 43.88 | 99.48   |
| PLE10           | 35.1    | 5.61    | 3.33     | 0.066   | 5.17    | 24.46   | 0.49    | 0.92    | 0.471   | 0.17    | 23.88 | 99.67   |
| RHE01           | 44.15   | 4.25    | 2.47     | 0.078   | 2.47    | 24.41   | 0.62    | 0.66    | 0.281   | 0.19    | 20.59 | 100.2   |
| RHE02           | 42.79   | 4.24    | 2.54     | 0.079   | 2.36    | 25.74   | 0.61    | 0.63    | 0.305   | 0.19    | 21.15 | 100.6   |

The ICP-MS analysis and measurement were carried out by the Activation Laboratories Ltd. in Ontario, Canada.

Table S2. Continuation.

| Analyte Symbol  | Sc      | Be      | V       | Cr     | Co     | Ni     | Cu     | Zn     | Ga     | Ge     | As     | Rb     |
|-----------------|---------|---------|---------|--------|--------|--------|--------|--------|--------|--------|--------|--------|
| Unit Symbol     | ppm     | ppm     | ppm     | ppm    | ppm    | ppm    | ppm    | ppm    | ppm    | ppm    | ppm    | ppm    |
| Detection Limit | 1       | 1       | 5       | 20     | 1      | 20     | 10     | 30     | 1      | 0.5    | 5      | 1      |
| Analysis Method | FUS-ICP | FUS-ICP | FUS-ICP | FUS-MS |
| PLE01           | 7       | 2       | 62      | 70     | 8      | 50     | 30     | 70     | 10     | 1      | < 5    | 62     |
| PLE02           | 7       | 2       | 60      | 160    | 11     | 90     | 30     | 60     | 9      | 1      | 5      | 56     |
| PLE03           | 7       | 2       | 66      | 80     | 10     | 60     | 40     | 110    | 10     | 0.7    | 7      | 70     |
| PLE04           | 8       | 2       | 72      | 180    | 13     | 110    | 30     | 70     | 10     | 0.8    | 9      | 61     |
| PLE05           | 6       | 1       | 51      | 280    | 17     | 200    | 30     | 50     | 6      | 0.8    | 9      | 44     |
| PLE06           | 6       | 1       | 41      | 160    | 11     | 100    | 20     | 40     | 5      | 1      | 11     | 29     |
| PLE07           | 7       | 1       | 54      | 200    | 14     | 150    | 30     | 50     | 7      | 0.7    | 16     | 45     |
| PLE08           | 13      | 2       | 105     | 550    | 42     | 450    | 70     | 130    | 15     | 1.3    | 17     | 94     |
| PLE09           | 1       | < 1     | 14      | < 20   | < 1    | < 20   | < 10   | 40     | 1      | < 0.5  | < 5    | 15     |
| PLE10           | 7       | 1       | 52      | 150    | 11     | 80     | 30     | 60     | 7      | 1.1    | 9      | 44     |
| RHE01           | 5       | 1       | 31      | 30     | 5      | 20     | 20     | 40     | 5      | 0.9    | 12     | 29     |
| RHE02           | 5       | 1       | 32      | 30     | 5      | 20     | 20     | 40     | 6      | 0.9    | 15     | 27     |

The ICP-MS analysis and measurement were carried out by the Activation Laboratories Ltd. in Ontario, Canada.

Table S2. Continuation.

| Analyte Symbol  | Sr      | Y      | Zr      | Nb     | Mo     | Ag     | In     | Sn     | Sb     | Cs     | Ba      | La     |
|-----------------|---------|--------|---------|--------|--------|--------|--------|--------|--------|--------|---------|--------|
| Unit Symbol     | ppm     | ppm    | ppm     | ppm    | ppm    | ppm    | ppm    | ppm    | ppm    | ppm    | ppm     | ppm    |
| Detection Limit | 2       | 0.5    | 1       | 0.2    | 2      | 0.5    | 0.1    | 1      | 0.2    | 0.1    | 2       | 0.05   |
| Analysis Method | FUS-ICP | FUS-MS | FUS-ICP | FUS-MS | FUS-ICP | FUS-MS |
| PLE01           | 647     | 19.5   | 247     | 7.4    | < 2    | < 0.5  | < 0.1  | 7      | 0.4    | 3.8    | 197     | 33.7   |
| PLE02           | 614     | 18.4   | 227     | 8.1    | < 2    | 0.5    | < 0.1  | 3      | 0.5    | 3.4    | 182     | 18.1   |
| PLE03           | 316     | 14.7   | 134     | 8.4    | 2      | < 0.5  | < 0.1  | 11     | 0.8    | 4.1    | 224     | 17.9   |
| PLE04           | 457     | 15.6   | 218     | 9.3    | < 2    | < 0.5  | < 0.1  | 3      | 0.5    | 3.4    | 229     | 18.8   |
| PLE05           | 152     | 11.6   | 129     | 6.2    | 2      | < 0.5  | < 0.1  | 4      | 1.4    | 3.2    | 144     | 13.5   |
| PLE06           | 531     | 17.1   | 361     | 8      | < 2    | 0.8    | < 0.1  | 3      | 0.3    | 1.4    | 124     | 15.3   |
| PLE07           | 387     | 15     | 292     | 8.4    | 2      | 0.8    | < 0.1  | 2      | 0.5    | 2.7    | 158     | 16.8   |
| PLE08           | 127     | 21.7   | 179     | 11.3   | < 2    | 0.5    | < 0.1  | 7      | 1.3    | 6.9    | 310     | 26.3   |
| PLE09           | 112     | 3.1    | 51      | 1.2    | < 2    | < 0.5  | < 0.1  | 2      | 0.9    | 2.5    | 75      | 3.15   |
| PLE10           | 712     | 28     | 1039    | 9.1    | < 2    | 2.2    | < 0.1  | 2      | 0.5    | 2.6    | 153     | 26.4   |
| RHE01           | 547     | 27.4   | 455     | 5.4    | < 2    | 0.9    | < 0.1  | 1      | 0.7    | 1.9    | 139     | 38.5   |
| RHE02           | 617     | 29.4   | 822     | 5.6    | < 2    | 1.8    | < 0.1  | 3      | 0.7    | 1.7    | 165     | 46.7   |

The ICP-MS analysis and measurement were carried out by the Activation Laboratories Ltd. in Ontario, Canada.

Table S2. Continuation.

| Analyte Symbol  | Ce     | Pr     | Nd     | Sm     | Eu     | Gd     | Tb     | Dy     | Ho     | Er     | Tm     | Yb     |
|-----------------|--------|--------|--------|--------|--------|--------|--------|--------|--------|--------|--------|--------|
| Unit Symbol     | ppm    |
| Detection Limit | 0.05   | 0.01   | 0.05   | 0.01   | 0.005  | 0.01   | 0.01   | 0.01   | 0.01   | 0.01   | 0.005  | 0.01   |
| Analysis Method | FUS-MS |
| PLE01           | 65.7   | 7.21   | 26.2   | 4.81   | 0.728  | 3.82   | 0.56   | 3.2    | 0.63   | 1.84   | 0.294  | 1.93   |
| PLE02           | 35.8   | 4.23   | 15.9   | 3.82   | 0.634  | 3.29   | 0.52   | 3.02   | 0.57   | 1.66   | 0.232  | 1.54   |
| PLE03           | 35.6   | 4.1    | 14.7   | 3.16   | 0.565  | 2.74   | 0.45   | 2.55   | 0.51   | 1.49   | 0.22   | 1.45   |
| PLE04           | 37.5   | 4.26   | 15.9   | 3.2    | 0.657  | 2.97   | 0.45   | 2.65   | 0.53   | 1.48   | 0.213  | 1.47   |
| PLE05           | 26.8   | 3.06   | 11     | 2.56   | 0.445  | 1.96   | 0.34   | 1.87   | 0.36   | 1.09   | 0.159  | 1.14   |
| PLE06           | 30.9   | 3.78   | 15     | 3.17   | 0.639  | 3.3    | 0.52   | 2.93   | 0.6    | 1.67   | 0.244  | 1.74   |
| PLE07           | 33.5   | 3.77   | 15.4   | 3.14   | 0.53   | 2.8    | 0.47   | 2.6    | 0.48   | 1.41   | 0.219  | 1.63   |
| PLE08           | 52.7   | 5.8    | 23.3   | 4.45   | 0.928  | 4.07   | 0.63   | 3.67   | 0.72   | 2.17   | 0.32   | 2.05   |
| PLE09           | 6.36   | 0.7    | 2.5    | 0.59   | 0.112  | 0.54   | 0.09   | 0.58   | 0.11   | 0.35   | 0.058  | 0.39   |
| PLE10           | 52.1   | 6.02   | 23.5   | 5.14   | 0.823  | 4.18   | 0.74   | 4.44   | 0.89   | 2.74   | 0.48   | 3.31   |
| RHE01           | 77.8   | 8.66   | 32.9   | 6.27   | 1.02   | 5.18   | 0.76   | 4.44   | 0.85   | 2.57   | 0.366  | 2.46   |
| RHE02           | 93.9   | 10.3   | 38.8   | 7.67   | 1.15   | 6.33   | 0.88   | 5.15   | 0.94   | 2.74   | 0.478  | 3.06   |

The ICP-MS analysis and measurement were carried out by the Activation Laboratories Ltd. in Ontario, Canada.

Table S2. Continuation.

| Analyte Symbol  | Lu     | Hf     | Ta     | W      | Ti     | Pb     | Bi     | Th     | U      |
|-----------------|--------|--------|--------|--------|--------|--------|--------|--------|--------|
| Unit Symbol     | ppm    |
| Detection Limit | 0.002  | 0.1    | 0.01   | 0.5    | 0.05   | 5      | 0.1    | 0.05   | 0.01   |
| Analysis Method | FUS-MS |
| PLE01           | 0.299  | 6.5    | 0.62   | 1.4    | 0.22   | 13     | < 0.1  | 7.8    | 2.33   |
| PLE02           | 0.263  | 6.3    | 0.58   | 1.6    | 0.2    | 11     | < 0.1  | 6.27   | 2.53   |
| PLE03           | 0.219  | 3.8    | 0.67   | 2.3    | 0.44   | 16     | < 0.1  | 5.94   | 2.77   |
| PLE04           | 0.237  | 5.9    | 0.7    | 1.4    | 0.34   | 12     | < 0.1  | 6.27   | 2.83   |
| PLE05           | 0.186  | 3.6    | 0.43   | 1.4    | 0.34   | 11     | < 0.1  | 3.78   | 3.01   |
| PLE06           | 0.296  | 10     | 0.66   | 1.2    | 0.16   | 8      | < 0.1  | 4.7    | 2.89   |
| PLE07           | 0.266  | 8.1    | 0.61   | 1.4    | 0.24   | 10     | < 0.1  | 5.36   | 3.25   |
| PLE08           | 0.319  | 5.2    | 0.83   | 1.9    | 0.65   | 34     | < 0.1  | 7.28   | 2.89   |
| PLE09           | 0.059  | 1.6    | 0.12   | < 0.5  | 0.39   | 8      | < 0.1  | 1.3    | 2.31   |
| PLE10           | 0.579  | 29.4   | 0.68   | 1.5    | 0.31   | 15     | < 0.1  | 9.09   | 5.49   |
| RHE01           | 0.423  | 12.7   | 0.45   | 1.7    | 0.07   | 14     | < 0.1  | 8.99   | 3.01   |
| RHE02           | 0.523  | 23.3   | 0.52   | 1.2    | 0.08   | 11     | < 0.1  | 9.58   | 3.99   |

The ICP-MS analysis and measurement were carried out by the Activation Laboratories Ltd. in Ontario, Canada.
